# Supplementary material for: Latency Trend Analysis as a Guide to Screening Malignancy Survivors for Second Primary Thyroid Cancer
Source: MDPI journal article supplement (doi:10.3390/biomedicines10081984), 2022-08-16
Supplement: s1 [file s1]

**Table S1.** Characteristics of SPTC patients according to the number of previous primary cancers.

| Characteristics      | Levels     | 1 PC         | 2 PC        | ≥3 PC       | Total        |
|----------------------|------------|--------------|-------------|-------------|--------------|
| Gender               | Female     | 8794 (62.9)  | 832 (57.7)  | 104 (52.8)  | 9730 (62.3)  |
|                      | Male       | 5186 (37.1)  | 611 (42.3)  | 93 (47.2)   | 5890 (37.7)  |
| Age, years           | Mean ± SD  | 61.8 ± 13.9  | 66.9 ± 12.7 | 71.2 ± 11.9 | 62.4 ± 13.9  |
|                      | <25y       | 155 (1.1)    | 3 (0.2)     | 2 (1)       | 160 (1)      |
|                      | <45y       | 1458 (10.4)  | 78 (5.4)    | 5 (2.5)     | 1541 (9.9)   |
|                      | <65y       | 6251 (44.7)  | 505 (35)    | 41 (20.8)   | 6797 (43.5)  |
|                      | <85y       | 5674 (40.6)  | 771 (53.4)  | 135 (68.5)  | 6580 (42.1)  |
|                      | 85y+       | 442 (3.2)    | 86 (6)      | 14 (7.1)    | 542 (3.5)    |
|                      |            |              |             |             |              |
| Race                 | White      | 11746 (84)   | 1241 (86)   | 170 (86.3)  | 13157 (84.2) |
|                      | Black      | 918 (6.6)    | 90 (6.2)    | 11 (5.6)    | 1422 (9.1)   |
|                      | Other      | 1297 (9.3)   | 109 (7.6)   | 16 (8.1)    | 22 (0.1)     |
| Histological type    | Papillary  | 11810 (84.5) | 1189 (82.4) | 156 (79.2)  | 13155 (84.2) |
|                      | Follicular | 1168 (8.4)   | 129 (8.9)   | 18 (9.1)    | 1315 (8.4)   |
|                      | Medullary  | 306 (2.2)    | 30 (2.1)    | 6 (3)       | 342 (2.2)    |
|                      | Anaplastic | 150 (1.1)    | 20 (1.4)    | 3 (1.5)     | 173 (1.1)    |
| Tumor stage          | Tx         | 300 (2.1)    | 33 (2.3)    | 7 (3.6)     | 340 (2.2)    |
|                      | T0         | 34 (0.2)     | 8 (0.6)     | 2 (1)       | 44 (0.3)     |
|                      | T1         | 3527 (25.2)  | 398 (27.6)  | 53 (26.9)   | 3978 (25.5)  |
|                      | T2         | 791 (5.7)    | 89 (6.2)    | 14 (7.1)    | 894 (5.7)    |
|                      | T3         | 1205 (8.6)   | 130 (9)     | 23 (11.7)   | 1358 (8.7)   |
|                      | T4         | 300 (2.1)    | 33 (2.3)    | 7 (3.6)     | 340 (2.2)    |
| LN infiltration      | Nx         | 225 (1.6)    | 25 (1.7)    | 7 (3.6)     | 257 (1.6)    |
|                      | N0         | 4672 (33.4)  | 524 (36.3)  | 79 (40.1)   | 5275 (33.8)  |
|                      | N1         | 1363 (9.7)   | 163 (11.3)  | 28 (14.2)   | 1554 (9.9)   |
| Distal metastasis    | Mx         | 7720 (55.2)  | 731 (50.7)  | 83 (42.1)   | 8523 (54.6)  |
|                      | M0         | 6057 (43.3)  | 691 (47.9)  | 113 (57.4)  | 6861 (43.9)  |
|                      | M1         | 203 (1.5)    | 21 (1.5)    | 1 (0.5)     | 225 (1.4)    |
| Clinical stage       | I          | 3313 (23.7)  | 347 (24)    | 50 (25.4)   | 3710 (23.8)  |
|                      | II         | 586 (4.2)    | 62 (4.3)    | 11 (5.6)    | 659 (4.2)    |
|                      | III        | 1169 (8.4)   | 132 (9.1)   | 22 (11.2)   | 1323 (8.5)   |
|                      | IV         | 794 (5.7)    | 115 (8)     | 17 (8.6)    | 926 (5.9)    |
| Primary site surgery | Negative   | 1491 (10.7)  | 210 (14.6)  | 45 (22.8)   | 1746 (11.2)  |
|                      | Positive   | 12031 (86.1) | 1183 (82)   | 143 (72.6)  | 13357 (85.5) |
| Radiotherapy         | Negative   | 9010 (64.4)  | 1005 (69.6) | 137 (69.5)  | 10152 (65)   |
|                      | Positive   | 4882 (34.9)  | 433 (30)    | 59 (29.9)   | 5374 (34.4)  |
| Chemotherapy         | Negative   | 13667 (97.8) | 1420 (98.4) | 193 (98)    | 15280 (97.8) |
|                      | Positive   | 313 (2.2)    | 23 (1.6)    | 4 (2)       | 340 (2.2)    |
| Vital status         | Alive      | 9586 (68.6)  | 881 (61.1)  | 104 (52.8)  | 10571 (67.7) |
|                      | Died       | 4394 (31.4)  | 562 (38.9)  | 93 (47.2)   | 5049 (32.3)  |

Data is represented as a number and percentage or mean and standard deviation (SD).  
PC: primary cancer, SPTC: second primary thyroid cancer, LN: lymph node.

**Table S2.** The latency trend in different cancer sites.

| Primary cancer site         | 2-11 months       | 12-59 months      | 60-119 months     | 120+ months       |
|-----------------------------|-------------------|-------------------|-------------------|-------------------|
|                             | SIR (LL-UL)       | SIR (LL-UL)       | SIR (LL-UL)       | SIR (LL-UL)       |
| All Sites                   | 4.06 (3.91-4.22)* | 1.75 (1.7-1.81)*  | 1.36 (1.30-1.42)* | 1.39 (1.29-1.49)* |
| Lymphoma                    | 9.56 (8.49-10.7)* | 2.21 (1.94-2.51)* | 1.63 (1.36-1.94)* | 2.12 (1.64-2.7)*  |
| Soft Tissue including Heart | 9.13 (6.43-12.6)* | 4.08 (3.07-5.33)* | 3.24 (2.18-4.62)* | 4.19 (2.44-6.71)* |
| Kidney and Renal Pelvis     | 7.37 (6.25-8.63)* | 3.74 (3.30-4.22)* | 2.44 (2.01-2.94)* | 3.02 (2.21-4.03)* |
| Leukemia                    | 3.43 (2.54-4.54)* | 1.40 (1.08-1.79)* | 1.89 (1.42-2.47)* | 2.03 (1.26-3.11)* |
| Breast                      | 3.38 (3.11-3.67)* | 1.52 (1.42-1.61)* | 1.13 (1.03-1.23)* | 1.29 (1.14-1.47)* |
| Uterus                      | 3.18 (2.61-3.83)* | 1.71 (1.49-1.96)* | 1.26 (1.03-1.52)* | 1.43 (1.05-1.90)* |
| Melanoma of the Skin        | 5.42 (4.65-6.28)* | 2.05 (1.81-2.32)* | 1.54 (1.31-1.81)* | 1.31 (0.99-1.70)  |
| Salivary Gland              | 12.4 (7.8-18.8)*  | 3.32 (2.03-5.13)* | 3.45 (1.93-5.69)* | 2.17 (0.59-5.55)  |
| Stomach                     | 5.31 (3.81-7.21)* | 2.33 (1.66-3.19)* | 1.87 (1.07-3.04)* | 0.37 (0.01-2.05)  |
| Lung and Bronchus           | 4.04 (3.54-4.60)* | 1.66 (1.42-1.93)* | 1.5 (1.16-1.92)*  | 1.54 (0.91-2.43)  |
| Colon and Rectum            | 3.46 (3.02-3.95)* | 1.86 (1.68-2.05)* | 1.31 (1.12-1.52)* | 1.28 (0.98-1.63)  |
| Pancreas                    | 2.42 (1.53-3.63)* | 2.89 (1.95-4.12)* | 4.12 (2.19-7.05)* | 3.58 (0.74-10.5)  |
| Prostate                    | 1.65 (1.39-1.94)* | 1.25 (1.14-1.37)* | 1.34 (1.21-1.48)* | 1.11 (0.92-1.32)  |
| Ovary                       | 3.22 (2.35-4.31)* | 1.48 (1.14-1.9)*  | 1.87 (1.36-2.52)* | 1.09 (0.52-2.0)   |
| Urinary Bladder             | 1.62 (1.16-2.21)* | 1.26 (1.03-1.53)* | 1.32 (1.03-1.66)* | 1.40 (0.93-2.02)  |
| Larynx                      | 13.2 (9.99-17.0)* | 2.50 (1.74-3.47)* | 0.68 (0.25-1.48)  | 1.30 (0.35-3.32)  |
| Bones and Joints            | 12 (5.96-21.4)*   | 4.01 (2.13-6.85)* | 1.5 (0.41-3.84)   | 1.44 (0.17-5.21)  |
| Oral Cavity and Pharynx     | 10.7 (9.12-12.5)* | 2.41 (1.98-2.90)* | 1.27 (0.90-1.74)  | 0.81 (0.37-1.53)  |
| Eye and Orbit               | 9.47 (4.89-16.5)* | 3.56 (2.04-5.79)* | 0.67 (0.08-2.43)  | 2.51 (0.52-7.34)  |
| Small Intestine             | 5.50 (3.14-8.93)* | 3.29 (2.24-4.67)* | 1.25 (0.5-2.57)   | 1.09 (0.13-3.93)  |
| Liver                       | 4.15 (2.71-6.08)* | 1.68 (1.01-2.63)* | 1.95 (0.84-3.84)  | 1.91 (0.23-6.89)  |
| Esophagus                   | 4.52 (2.68-7.14)* | 1.49 (0.71-2.74)  | 1.36 (0.37-3.48)  | 0 (0-4.1)         |
| Brain                       | 1.84 (0.95-3.22)  | 2.26 (1.54-3.21)* | 2.29 (1.40-3.53)* | 2.74 (1.37-4.9)*  |

SIR: standardized incidence ratio, UL: upper limit confidence interval, LL: lower limit of the confidence interval. \*  $p < 0.05$ . SIR was calculated as the ratio of observed numbers to expected numbers.

**Table S3.** RNA sequencing expression of tumor and normal samples from The Cancer Genome Atlas (TCGA) and the Genotype Tissue Expression project (GTEx). A total of 5,285 tumors and 3,135 normal samples were identified and analyzed.

| TCGA | Cancer Name                                     | Tumor              | Normal            | GTEx     | Normal             |
|------|-------------------------------------------------|--------------------|-------------------|----------|--------------------|
| THCA | Thyroid carcinoma                               | 512                | 59                | Thyroid  | 278                |
| BRCA | Breast adenocarcinoma                           | 1085               | 112               | Breast   | 179                |
| COAD | Colon adenocarcinoma                            | 275                | 41                | Colon    | 308                |
| DLBC | Lymphoid neoplasm diffuse large B-cell lymphoma | 47                 | -                 | Blood    | 337                |
| GBM  | Glioblastoma multiforme                         | 163                | -                 | Brain    | 207                |
| HNSC | Head and neck squamous cell carcinoma           | 519                | 44                | -        | -                  |
| KIRC | Kidney renal clear cell carcinoma               | 523                | 72                | Kidney   | 28                 |
| LIHC | Liver hepatocellular carcinoma                  | 369                | 50                | Liver    | 110                |
| PAAD | Pancreatic adenocarcinoma                       | 179                | 4                 | Pancreas | 167                |
| SKCM | Skin cutaneous melanoma                         | 461                | 1                 | Skin     | 557                |
| PRAD | Prostate adenocarcinoma                         | 492                | 52                | Prostate | 100                |
| UCEC | Uterine corpus endometrial carcinoma            | 174                | 13                | Uterus   | 78                 |
| LUSC | Lung squamous cell carcinoma                    | 486                | 50                | Lung     | 288                |
| PRAD | Prostate adenocarcinoma                         | 492                | 52                | Prostate | 100                |
|      |                                                 |                    |                   |          |                    |
|      |                                                 | <b><u>5285</u></b> | <b><u>498</u></b> |          | <b><u>2637</u></b> |

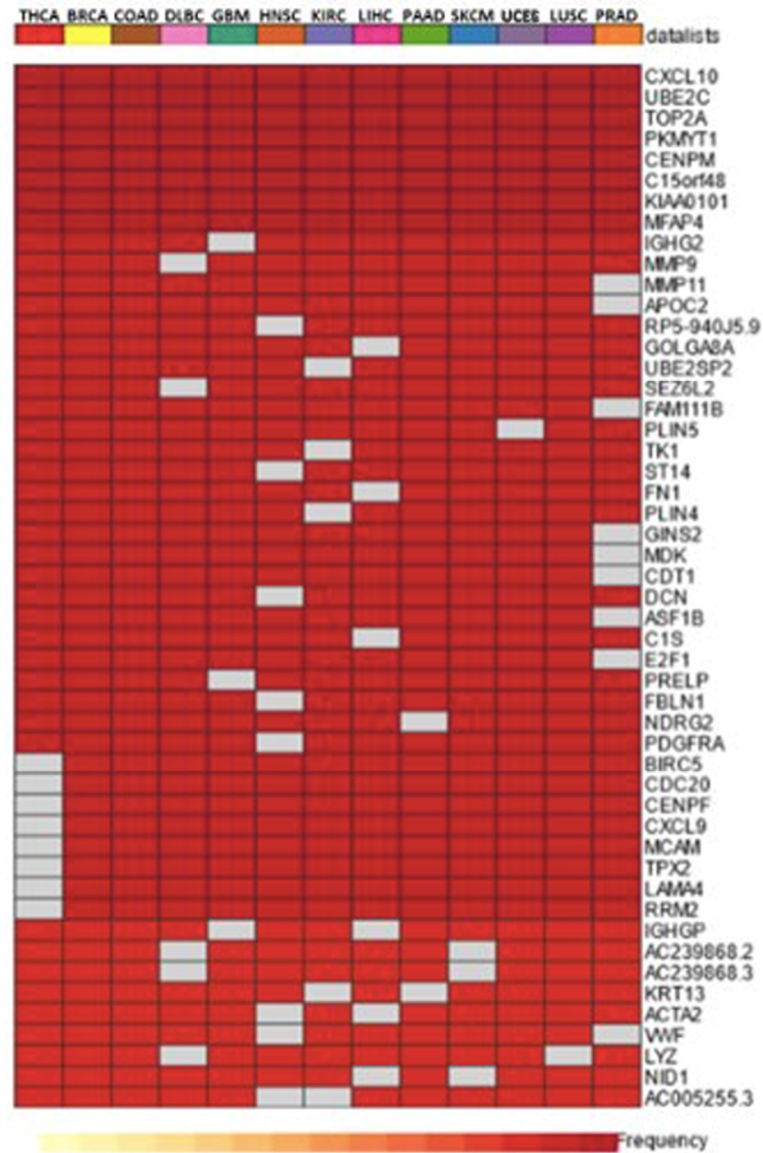

**Figure S1.** Heatmap expression pattern of dysregulated genes among different cancers. The most common 50 dysregulated genes (rows) are ranked in a hierarchical fashion (top to bottom). Frequency of dysregulation is represented along a spectrum, with red and white symbolizing frequent and infrequent gene dysregulation respectively. Eight genes were found to be frequently dysregulated across all 13 cancer types. THCA: Thyroid carcinoma; BRCA: Breast adenocarcinoma; COAD: Colon adenocarcinoma; DLBC: Lymphoid neoplasm diffuse large B- cell lymphoma; GBM: Glioblastoma multiforme; HNSC: Head and neck squamous cell carcinoma; KIRC: Kidney renal clear cell carcinoma. LIHC: Liver hepatocellular carcinoma; PAAD: Pancreatic adenocarcinoma; SKCM: Skin cutaneous melanoma; UCEC: Uterine corpus endometrial carcinoma; LUSC: Lung squamous cell carcinoma; PRAD: Prostate adenocarcinoma.
